# Supplementary material for: Processing and Bypass of a Site-Specific DNA Adduct of the Cytotoxic Platinum–Acridinylthiourea Conjugate by Polymerases Involved in DNA Repair: Biochemical and Thermodynamic Aspects
Source: MDPI journal article supplement (doi:10.3390/ijms221910838), 2021-10-07
Supplement: s1 [file s1]

## Supplementary material to:

# Processing and Bypass of a Site-Specific DNA Adduct of the Cytotoxic Platinum–Acridinylthiourea Conjugate by Polymerases Involved in DNA Repair: Biochemical and Thermodynamic Aspects

Monika Hreusova<sup>1</sup>, Viktor Brabec<sup>1,2</sup> and Olga Novakova<sup>1,\*</sup>

<sup>1</sup> Czech Academy of Sciences, Institute of Biophysics, Kralovopolska 135, CZ- 61265 Brno, Czech Republic; olga@ibp

<sup>2</sup> Department of Biophysics, Faculty of Science, Palacky University, Slechtitelu 27, CZ 78371 Olomouc, Czech Republic; brabec@ibp.cz

\* Correspondence: olga@ibp.cz; Tel.: +420-541-517-135

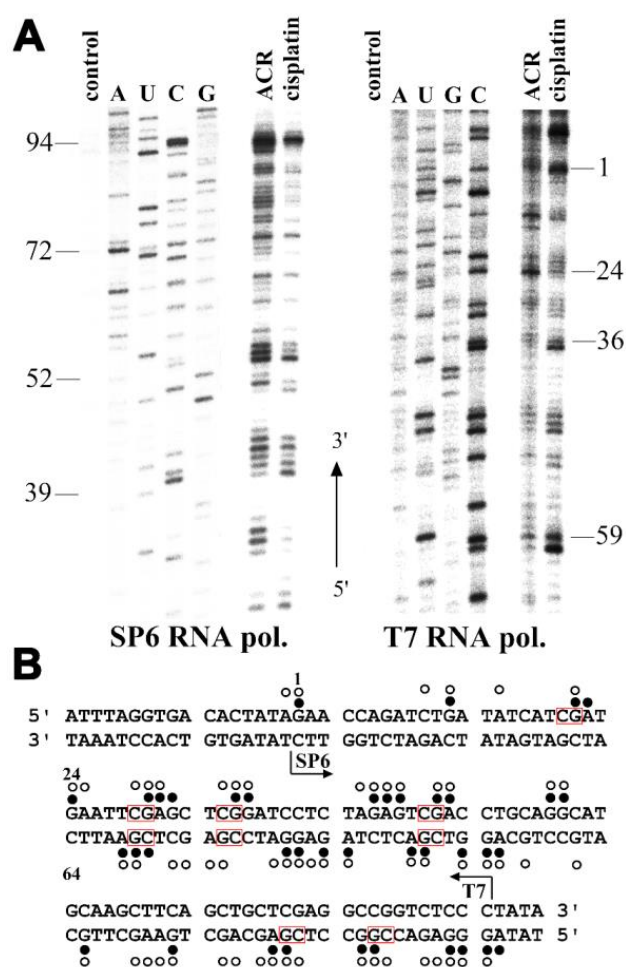

**Figure S1.** Inhibition of RNA synthesis by SP6 and T7 RNA polymerases on the whole pSP73KB plasmid modified by ACR, monofunctional platinum conjugate, and cisplatin. A. Autoradiograms of 8 % polyacrylamide/8 M urea sequencing gels showing inhibition of RNA synthesis by SP6 (left) or T7 RNA polymerases (right) on the plasmid DNA containing adducts of platinum complexes. Lanes: control, unmodified template; A, U, C, and G, chain terminated marker RNAs; ACR and cisplatin, the template modified by Pt(II)-ACR at  $r_b = 0.016$  (SP6 RNA pol.) or  $r_b = 0.009$  (T7 RNA pol.), or cisplatin at  $r_b = 0.006$  and  $0.008$ , respectively. B. Schematic diagram showing the portion of the sequence used to monitor inhibition of RNA synthesis by platinum complexes. The arrows indicate the start of the SP6 and T7 RNA polymerase, which used as a template the bottom or upper strand of the pSP73KB DNA, respectively. (●) major stop signals (from Figure S1A) for DNA modified by cisplatin; (○) stop signals for DNA modified by ACR. The numbers correspond to the nucleotide numbering in the sequence map of the pSP73KB plasmid. The red frame indicates 5'-CG sequences where the stop signals of ACR occurred.

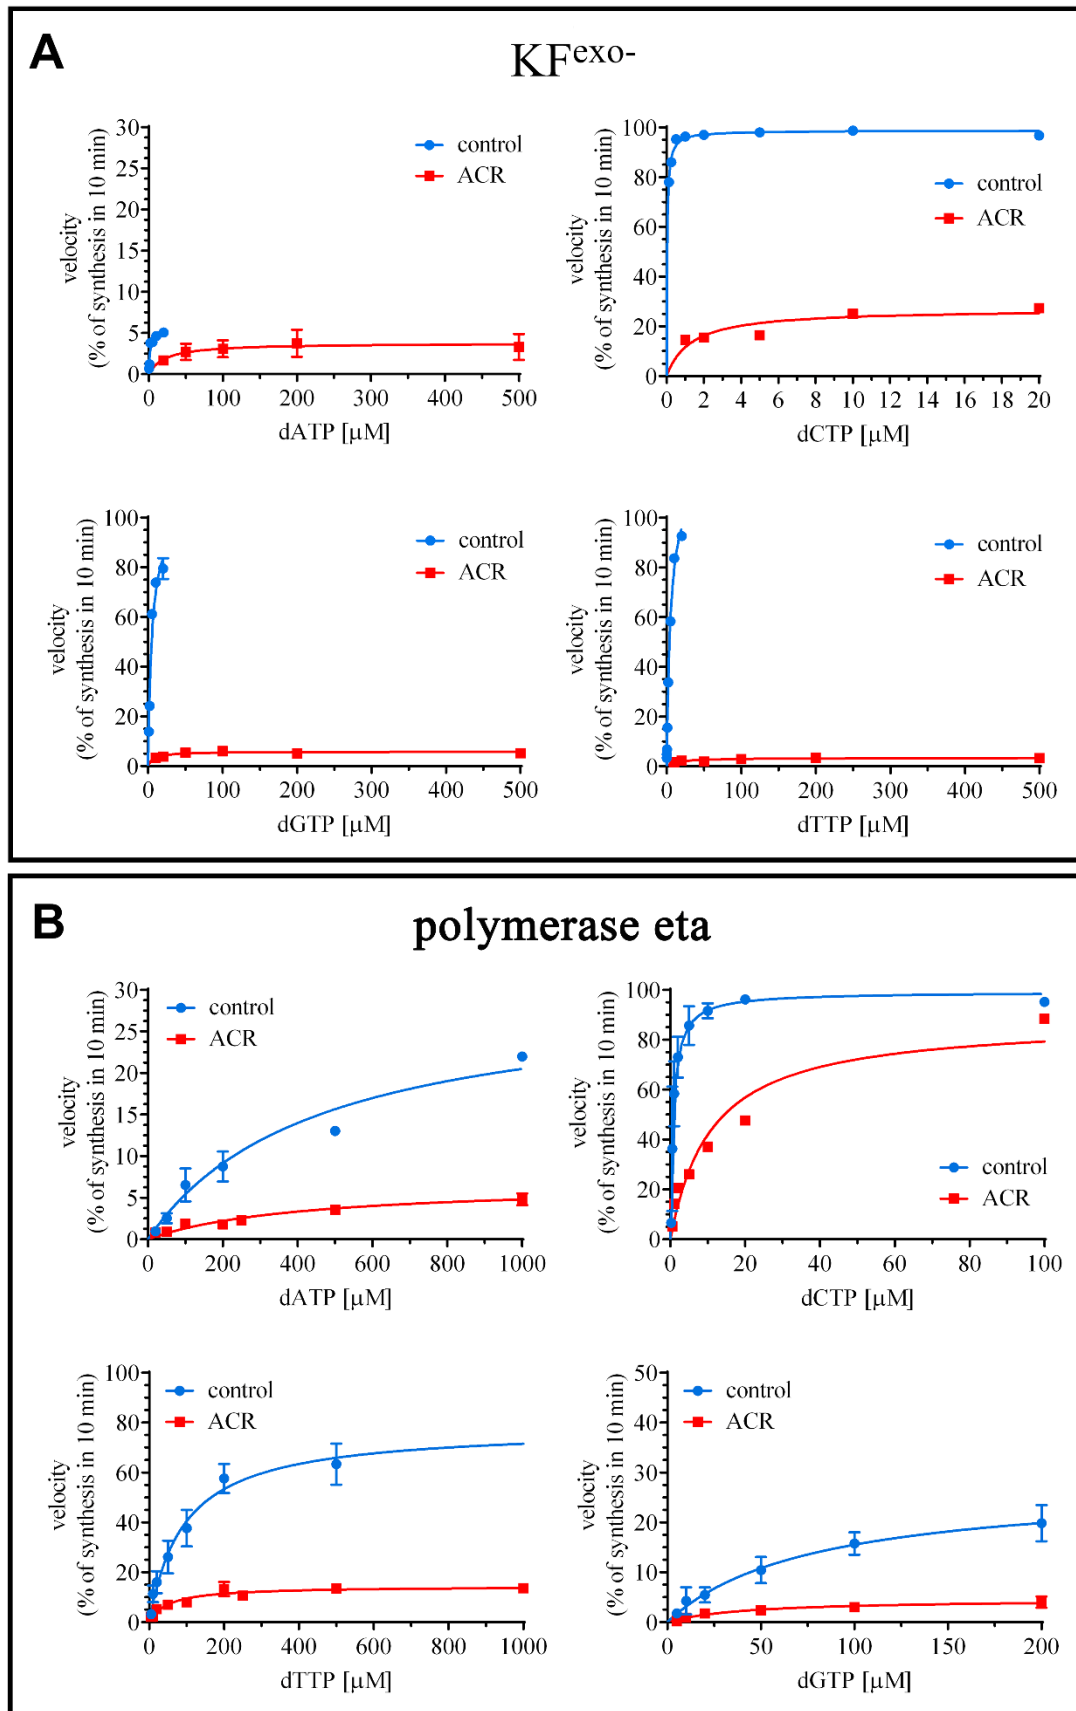

**Figure S2.** Steady-state kinetic analysis-graphical representation of individual dNTP insertions by  $KF^{exo-}$  (panel A) and human pol $\eta$  (panel B). Data are means ( $\pm$ SEM) from at least two different experiments; for some points, the error bar is shorter than the height of the symbol. Fitting was to a hyperbolic equation in GraphPad Prism v. 7.04, and  $V_{max}$ ,  $t$ , and  $K_m$  values are presented in Table S1 and S2, respectively.

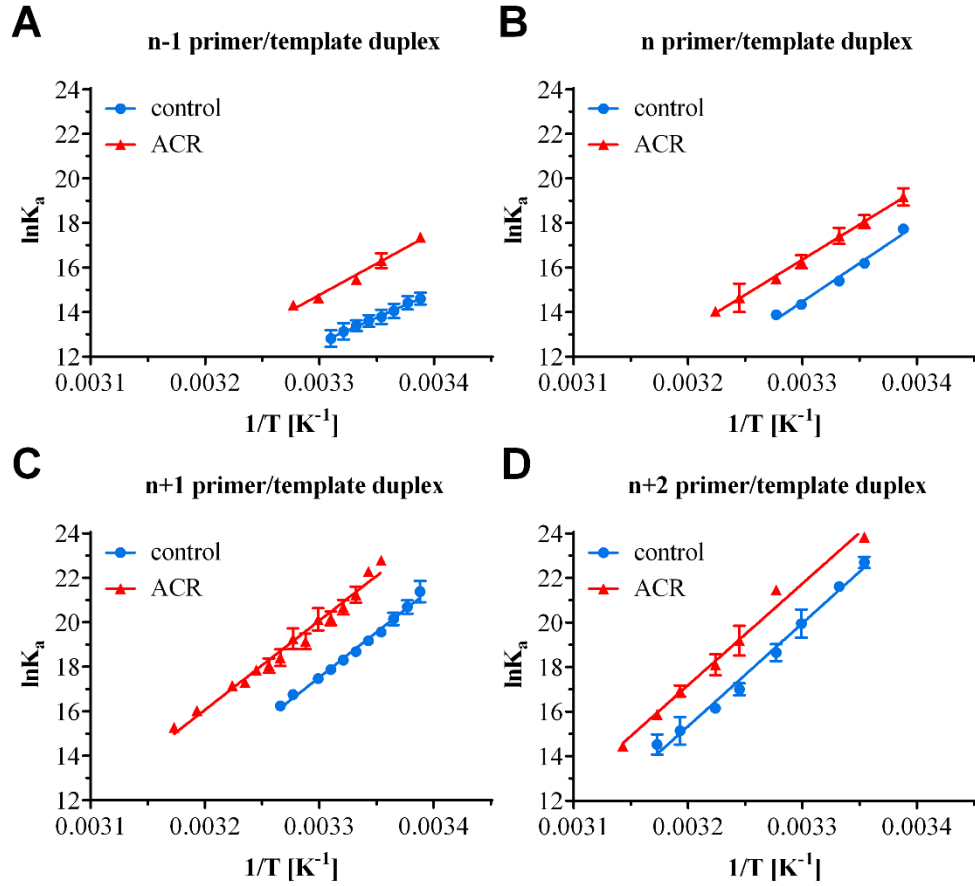

**Figure S3.** Microscale thermophoresis (MST) determination of the thermodynamic parameters of DNA constructs designed to simulate translesion DNA synthesis (TLS). Van't Hoff plots of the n-1 (A), n (B), n+1 (C) or n+2 (D) primer-template hybridization reactions.  $K_a$  values were calculated for each temperature by fitting the T-Jump or thermophoresis signal and plotted as  $\ln(K_a = 1/K_d)$  vs.  $1/T$  (K).  $\Delta H$  was obtained from the slope  $m$  of the linear fit as  $m = -\Delta H^\circ/R$ . Under the assumption that  $\Delta H$  is constant in the relatively small linear range of the van't Hoff plot,  $\Delta S$  was directly derived from the plot as  $y(0) = \Delta S^\circ/R$ . The universal gas constant  $R = 8.314 \text{ J K}^{-1}\text{mol}^{-1}$ . Data are means ( $\pm$ SD) from at least two different experiments, for some points, the error bar is shorter than the height of the symbol; coefficient of determination  $r^2 > 0.98$ .

**Table S1.** Steady-state kinetics of the incorporation of dNTP by **KF<sup>exo</sup>**. The dNTP incorporation opposite the position of the adduct and extended (17+) in 24-mer DNA template platinated by ACR or unplatinated control, which formed duplex with 16-mer primer (n - 1). n = complementary C or non-complementary A, G, or T nucleotide in extended primer.

| Control duplex | $V_{\max}$<br>(% min <sup>-1</sup> ) | $K_m$<br>( $\mu$ M) | $V_{\max}/K_m$ | $f^a$   | $RF^b$ |
|----------------|--------------------------------------|---------------------|----------------|---------|--------|
| <b>n = C</b>   | 9.88 $\pm$ 0.06                      | 0.033 $\pm$ 0.003   | 301.0          |         |        |
| n = A          | 0.578 $\pm$ 0.051                    | 2.39 $\pm$ 0.65     | 0.242          | 0.00080 |        |
| n = G          | 10.5 $\pm$ 0.9                       | 5.14 $\pm$ 1.23     | 2.043          | 0.00679 |        |
| n = T          | 12.2 $\pm$ 0.6                       | 5.42 $\pm$ 0.71     | 2.251          | 0.00748 |        |

  

| Duplex containing ACR | $V_{\max}$<br>(% min <sup>-1</sup> ) | $K_m$<br>( $\mu$ M) | $V_{\max}/K_m$ | $f^a$   | $RF^b$ |
|-----------------------|--------------------------------------|---------------------|----------------|---------|--------|
| <b>n = C</b>          | 2.70 $\pm$ 0.34                      | 1.33 $\pm$ 0.71     | 2.024          |         | 0.01   |
| n = A                 | 0.378 $\pm$ 0.088                    | 21.9 $\pm$ 16.5     | 0.017          | 0.00840 | 0.07   |
| n = G                 | 0.579 $\pm$ 0.061                    | 7.21 $\pm$ 5.32     | 0.080          | 0.03953 | 0.04   |
| n = T                 | 0.334 $\pm$ 0.049                    | 13.1 $\pm$ 9.7      | 0.025          | 0.01235 | 0.01   |

<sup>a</sup> misincorporation frequency  $f = (V_{\max}/K_m)_{\text{incorrect dNTP}} / (V_{\max}/K_m)_{\text{correct dNTP}}$

<sup>b</sup> relative efficiency  $RF$  compares the efficiency ( $V_{\max}/K_m$ ) of the particular dNTP insertion opposite ACR adduct in 5'-TCGT- (24-mer) templates to the efficiency of the same dNTP insertion opposite unmodified G in control, unplatinated template.

**Table S2.** Steady-state kinetics of the incorporation of dNTP by human DNA **polymerase  $\epsilon$** . The dNTP incorporation opposite the position of the adduct and extended (17+) in 24-mer DNA template platinated by ACR or unplatinated control, which formed duplex with 16-mer primer (n - 1). n = complementary C or non-complementary A, G or T nucleotide in extended primer (17+).

| Control duplex | $V_{\max}$<br>(% min <sup>-1</sup> ) | $K_m$<br>( $\mu$ M) | $V_{\max}/K_m$ | $f^a$   | $RF^b$ |
|----------------|--------------------------------------|---------------------|----------------|---------|--------|
| <b>n = C</b>   | 9.91 $\pm$ 0.64                      | 0.802 $\pm$ 0.233   | 12.37          |         |        |
| n = A          | 2.97 $\pm$ 0.78                      | 450 $\pm$ 206       | 0.007          | 0.00057 |        |
| n = G          | 2.76 $\pm$ 0.64                      | 77.5 $\pm$ 40.8     | 0.036          | 0.00292 |        |
| n = T          | 7.82 $\pm$ 0.85                      | 93.2 $\pm$ 27.9     | 0.084          | 0.00679 |        |

  

| Duplex containing ACR | $V_{\max}$<br>(% min <sup>-1</sup> ) | $K_m$<br>( $\mu$ M) | $V_{\max}/K_m$ | $f^a$   | $RF^b$ |
|-----------------------|--------------------------------------|---------------------|----------------|---------|--------|
| <b>n = C</b>          | 8.80 $\pm$ 0.43                      | 11.0 $\pm$ 2.6      | 0.802          |         | 0.06   |
| n = A                 | 0.679 $\pm$ 0.094                    | 414 $\pm$ 128       | 0.002          | 0.00249 | 0.29   |
| n = G                 | 0.464 $\pm$ 0.082                    | 42.3 $\pm$ 20.6     | 0.011          | 0.01372 | 0.31   |
| n = T                 | 1.44 $\pm$ 0.21                      | 51.4 $\pm$ 23.1     | 0.028          | 0.03491 | 0.33   |

The footnotes <sup>a, b</sup> have the same meaning as those under Table S1.

**Table S3.** MST-derived thermodynamic parameters of dissociation of duplexes formed between the 15-mer DNA templates (unmodified control duplex and template platinated by ACR) and primers n - 1, n, n + 1, or n + 2.

| Control duplexes <sup>1</sup> | $\Delta H$<br>(kJ mol <sup>-1</sup> ) <sup>2</sup> | $\Delta S$<br>(kJ K <sup>-1</sup> mol <sup>-1</sup> ) <sup>2</sup> | $\Delta G_0^{310}$<br>(kJ mol <sup>-1</sup> ) <sup>2</sup> | $\Delta G_0^{298}$<br>(kJ mol <sup>-1</sup> ) <sup>2</sup> | $K_d^{[310]3}$<br>(nM) | $K_d^{[298]3}$<br>(nM) |
|-------------------------------|----------------------------------------------------|--------------------------------------------------------------------|------------------------------------------------------------|------------------------------------------------------------|------------------------|------------------------|
| n-1                           | 187                                                | 0.511                                                              | 28.5                                                       | 34.6                                                       | 15846                  | 867                    |
| n                             | 295                                                | 0.853                                                              | 30.4                                                       | 40.7                                                       | 7585                   | 74.0                   |
| n+1                           | 339                                                | 0.973                                                              | 37.2                                                       | 48.9                                                       | 543                    | 2.71                   |
| n+2                           | 385                                                | 1.106                                                              | 42.0                                                       | 55.2                                                       | 84.4                   | 0.213                  |

  

| Duplexes containing ACR adduct | $\Delta H$<br>(kJ mol <sup>-1</sup> ) | $\Delta S$<br>(kJ K <sup>-1</sup> mol <sup>-1</sup> ) | $\Delta G_0^{310}$<br>(kJ mol <sup>-1</sup> ) | $\Delta G_0^{298}$<br>(kJ mol <sup>-1</sup> ) | $K_d^{[310]3}$<br>(nM) | $K_d^{[298]3}$<br>(nM) |
|--------------------------------|---------------------------------------|-------------------------------------------------------|-----------------------------------------------|-----------------------------------------------|------------------------|------------------------|
| n-1                            | 234 (47)                              | 0.649 (0.138)                                         | 32.7 (4.2)                                    | 40.5 (5.9)                                    | 3109                   | 80.2                   |
| n                              | 260 (-35)                             | 0.722 (-0.131)                                        | 36.1 (5.7)                                    | 44.7 (4.0)                                    | 832                    | 14.7                   |
| n+1                            | 335 (-4)                              | 0.940 (-0.033)                                        | 43.5 (6.3)                                    | 54.7 (5.8)                                    | 47.2                   | 0.261                  |
| n+2                            | 380 (-5)                              | 1.080 (-0.026)                                        | 45.0 (3.0)                                    | 58.0 (3.3)                                    | 26.4                   | 0.069                  |

<sup>1</sup>The nucleotide sequences of the templates and primers are shown in Figures 1 and 5.

<sup>2</sup> The  $\Delta H$  and  $\Delta S$  values are averages derived from two independent experiments. The uncertainties of the parameters are as follows:  $\Delta H$  ( $\pm 3\%$ ),  $\Delta S$  ( $\pm 5\%$ ),  $\Delta G_0^{310, 298}$  ( $\pm 2\%$ ),  $K_d^{[298]}$  or  $K_d^{[310]}$  ( $\pm 20\%$ ). “ $\Delta\Delta$ ” parameters are in parentheses (these parameters are computed by subtracting the appropriate value measured for the control duplex from the value measured for the same duplex containing the monofunctional adduct of ACR.  $\Delta G_0^{310, 298} = \Delta H - T\Delta S$ ;  $T = 310$  or  $298$  K. <sup>3</sup>  $K_d^{[310]}$  or  $K_d^{[298]}$  denote the dissociation constants for strand dissociation at 310 or 298 K, respectively.  $K_d$  was obtained after recalculation from the equation  $\Delta G_0^{310, 298} = -RT^{310, 298} \times \ln K_d$ .
